# Supplementary material for: Deducing high-accuracy protein contact-maps from a triplet of coevolutionary matrices through deep residual convolutional networks
Source: PubMed Central journal article supplement (PMC8026059; doi:10.1371/journal.pcbi.1008865), 2021-03-26
Supplement: pcbi.1008865.s001.pdf [file pcbi.1008865.s001.pdf]

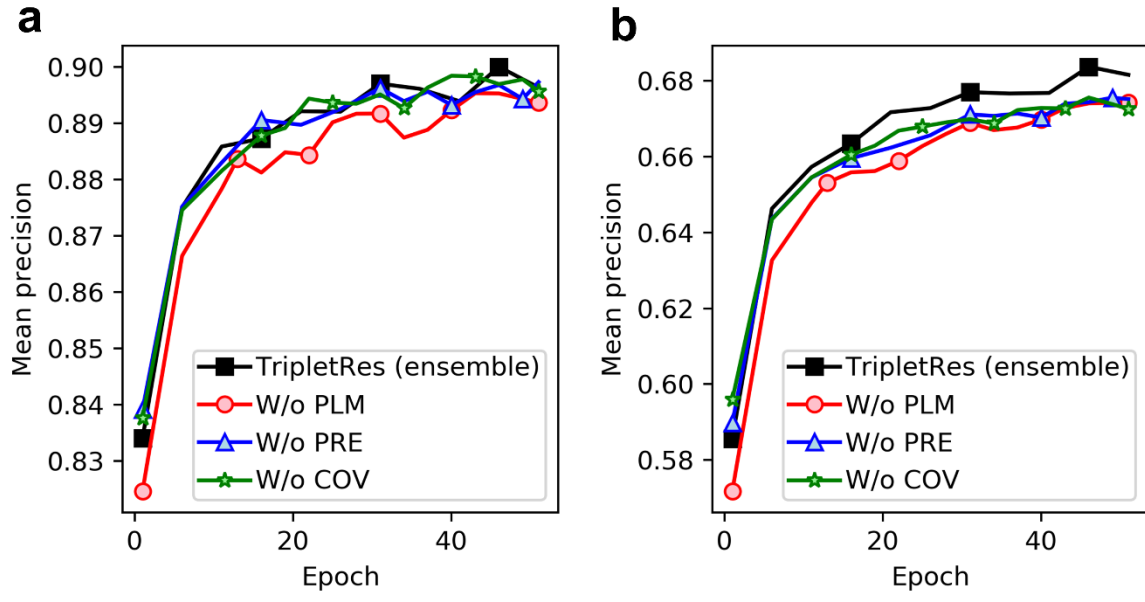

**S1 Fig.** Comparison of the average precisions over training epochs without individual coevolutionary features and the TripletRes model that ensembles all three sets of features, on the validation set. (a) top- $L/5$  precision, (b) top- $L$  precision.
