# Supplementary material for: Deducing high-accuracy protein contact-maps from a triplet of coevolutionary matrices through deep residual convolutional networks
Source: PubMed Central journal article supplement (PMC8026059; doi:10.1371/journal.pcbi.1008865), 2021-03-26
Supplement: pcbi.1008865.s002.pdf [file pcbi.1008865.s002.pdf]

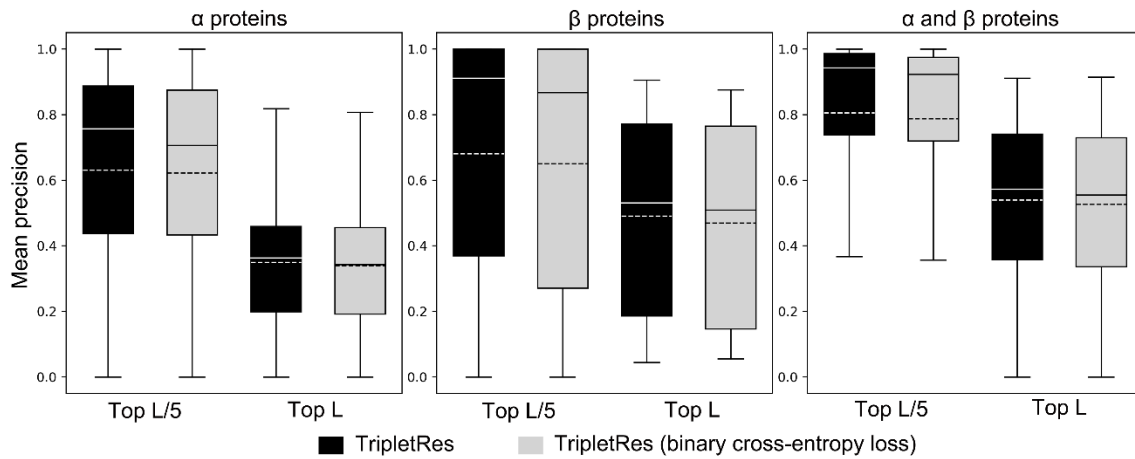

**S2 Fig.** Comparison of long-range top- $L/5$  and top- $L$  precisions with different loss functions on the different fold types, where median precision and mean precision are marked in solid and dash lines, respectively.
