# Supplementary material for: Deducing high-accuracy protein contact-maps from a triplet of coevolutionary matrices through deep residual convolutional networks
Source: PubMed Central journal article supplement (PMC8026059; doi:10.1371/journal.pcbi.1008865), 2021-03-26
Supplement: pcbi.1008865.s004.pdf [file pcbi.1008865.s004.pdf]

**S1 Table.** Summary of long-range contact precision by TripletRes and control methods tweaked with DeepMSAs on 50 CASP11&12 FM targets and 195 CAMEO hard targets, sorted in ascending order of top- $L$  precision. p-values in parenthesis are from a Student's t-test between TripletRes and each of the control methods, where bold fonts highlight the best performer in each category.

| Methods     | 50 CASP FM targets |                    |                    |                    | 195 CAMEO hard targets |                    |                    |                    |
|-------------|--------------------|--------------------|--------------------|--------------------|------------------------|--------------------|--------------------|--------------------|
|             | $L/10$             | $L/5$              | $L/2$              | $L$                | $L/10$                 | $L/5$              | $L/2$              | $L$                |
| CCMpred     | 0.416<br>(1.0e-11) | 0.374<br>(3.2e-13) | 0.264<br>(2.6e-16) | 0.187<br>(4.5e-17) | 0.451<br>(1.0e-50)     | 0.411<br>(5.7e-56) | 0.314<br>(2.8e-66) | 0.229<br>(4.6e-67) |
| DNCON2      | 0.599<br>(3.5e-06) | 0.551<br>(6.8e-06) | 0.460<br>(2.5e-06) | 0.353<br>(8.2e-08) | 0.670<br>(1.4e-13)     | 0.622<br>(4.8e-18) | 0.503<br>(2.0e-29) | 0.379<br>(3.6e-36) |
| MetaPSICOV2 | 0.571<br>(2.8e-07) | 0.513<br>(5.5e-08) | 0.401<br>(1.9e-10) | 0.299<br>(1.2e-12) | 0.594<br>(7.0e-24)     | 0.541<br>(6.2e-29) | 0.431<br>(3.4e-38) | 0.323<br>(3.8e-42) |
| DeepContact | 0.629<br>(1.3e-07) | 0.583<br>(1.3e-06) | 0.478<br>(1.3e-07) | 0.360<br>(6.8e-10) | 0.699<br>(2.8e-15)     | 0.643<br>(9.3e-21) | 0.508<br>(2.6e-35) | 0.384<br>(1.1e-38) |
| ResPRE      | 0.709<br>(2.9e-03) | 0.660<br>(8.8e-04) | 0.549<br>(1.6e-04) | 0.429<br>(4.2e-05) | 0.770<br>(6.0e-05)     | 0.725<br>(1.4e-05) | 0.599<br>(3.8e-12) | 0.457<br>(7.9e-18) |
| TripletRes  | <b>0.771</b>       | <b>0.714</b>       | <b>0.597</b>       | <b>0.464</b>       | <b>0.801</b>           | <b>0.756</b>       | <b>0.637</b>       | <b>0.491</b>       |
