# Supplementary material for: Deducing high-accuracy protein contact-maps from a triplet of coevolutionary matrices through deep residual convolutional networks
Source: PubMed Central journal article supplement (PMC8026059; doi:10.1371/journal.pcbi.1008865), 2021-03-26
Supplement: pcbi.1008865.s005.pdf [file pcbi.1008865.s005.pdf]

**S2 Table.** Summary of long-range contact precision by TripletRes, TripletRes (Post-CASP13) and trRosetta based on the same MSAs on 37 hybrid test sequences.

| Methods                  | <i>L</i> /10 | <i>L</i> /5  | <i>L</i> /2  | <i>L</i>     |
|--------------------------|--------------|--------------|--------------|--------------|
| TripletRes               | 0.775        | 0.698        | 0.578        | 0.434        |
| trRosetta                | <b>0.821</b> | <b>0.772</b> | <b>0.648</b> | <b>0.484</b> |
| TripletRes (Post-CASP13) | 0.814        | 0.762        | 0.623        | 0.471        |
