# Supplementary material for: Deducing high-accuracy protein contact-maps from a triplet of coevolutionary matrices through deep residual convolutional networks
Source: PubMed Central journal article supplement (PMC8026059; doi:10.1371/journal.pcbi.1008865), 2021-03-26
Supplement: pcbi.1008865.s006.pdf [file pcbi.1008865.s006.pdf]

## S1 Text. Explanation that DCA models capture linear relationships between residues

Considering the pseudolikelihood maximized Potts model as an example, the marginal probability of  $l$ -th position in the sequence is defined by equation (5) in main text:

$$P(\sigma_l = \sigma_l^{(m)} | \sigma_{\setminus l} = \sigma_{\setminus l}^{(m)}) = \frac{\exp(h_l(\sigma_l^{(m)}) + \sum_{k=1, k \neq l}^L J_{lk}(\sigma_l^{(m)}, \sigma_k^{(m)}))}{\sum_{q=1}^{21} \exp(h_l(q) + \sum_{k=1, k \neq l}^L J_{lk}(q, \sigma_k^{(m)})}$$

This equation can be interpreted as a Multinomial logistic regression model, a “log-linear” model. The outcome term is the  $l$ -th position, and the input features are other positions except  $l$ -th position.  $J_{lk}(a, b)$  can be considered as a regression coefficient associated with the residue type  $b$  at position  $k$  variable and the outcome ( $l$ -th position) with residue type  $b$ .  $h_l(b)$  can be interpreted as the bias parameter of position  $l$  being residue type  $b$ .

In addition, the inverse of covariance matrix (precision matrix) can also be interpreted as linear regression models [1,2].

## References

1. Kwan CC. A regression-based interpretation of the inverse of the sample covariance matrix. *Spreadsheets in Education*. 2014;7(1):4613.
2. Stevens GV. On the inverse of the covariance matrix in portfolio analysis. *The Journal of Finance*. 1998;53(5):1821-7.
